# Supplementary material for: Investigation on the homogeneity of pulsed electrochemically deposited thermoelectric films with synchrotron μ-XRF, μ-XRD and μ-XANES
Source: Royal Society of Chemistry journal article supplement (doi:10.1039/c3ta01480k), 2013-01-01
Supplement: c3ta01480k.pdf [file c3ta01480k.pdf]

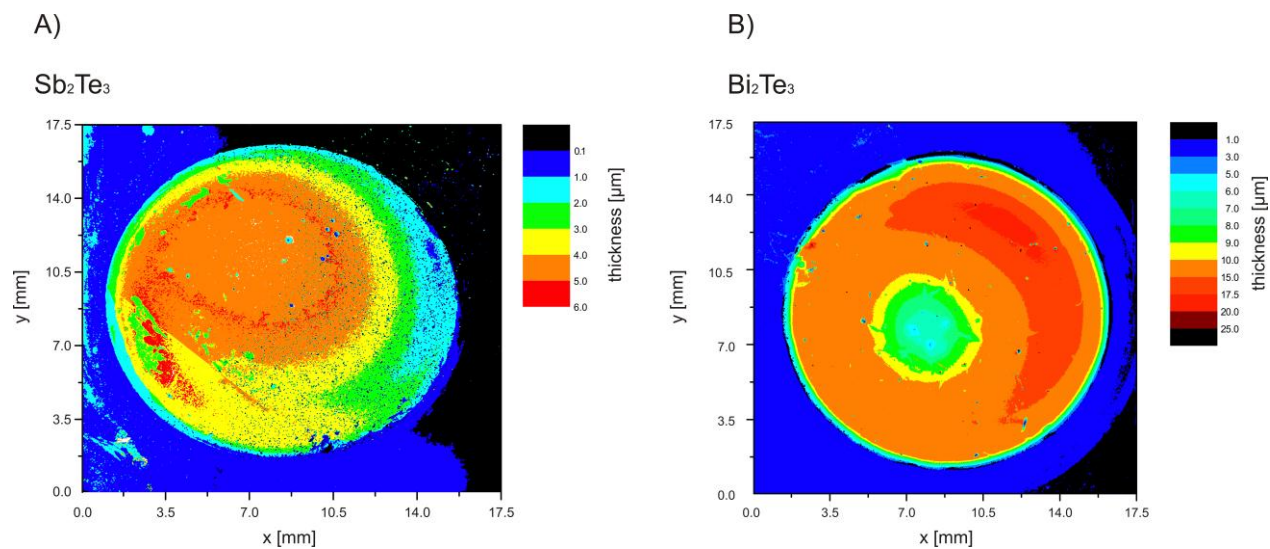

Figure S1: Optical profilometry thickness measurements for  $\text{Sb}_2\text{Te}_3$  (A) and  $\text{Bi}_2\text{Te}_3$  (B). The results confirm qualitatively the calculations from Au fluorescence intensities.
